# Supplementary material for: Macular thickness in healthy eyes of adults (N = 4508) and relation to sex, age and refraction: the Tromsø Eye Study (2007–2008)
Source: PubMed Central journal article supplement — Acta Ophthalmol. 2016 Dec 18;95(3):262–9. doi: 10.1111/aos.13337 (PMC5412929; doi:10.1111/aos.13337), 2016-12-18
Supplement: AOS-95-262-s001.pdf [file AOS-95-262-s001.pdf]

7306 Participants

205 Participants with Glaucoma

623 Participants with Diabetes Mellitus

6478 Participants remained

881 Participants had no OCT on either eye  
(942 Right eyes, 940 Left eyes)

5597 Participants remained  
(5536 Right eyes, 5538 Left eyes)

867 Participants with pathology on OCT in both or  
only eye. (1362 Right eyes, 1410 Left eyes)

4730 Participants remained  
(4174 Right eyes, 4128 Left eyes)

153 Participants with poor quality OCT scans  
(Incorrect traces of ILM/RPE, decentered scan or  
signal strength < 5) in both or only eye.  
(234 Right eyes, 234 Left eyes)

4577 Participants remained  
(3940 Right eyes, 3894 Left eyes)

61 Participants with refractive error, spherical  
refractive equivalent, <-6.0 or >+6.0 diopters in both  
or only eye. (58 Right eyes, 57 Left eyes)

4516 Participants remained  
(3882 Right eyes, 3837 Left eyes)

8 Participants with retinal vascular occlusion in both  
or only eye, evaluated from fundus photo. (15 Right  
eyes, 18 Left eyes)

4508 Participants remained  
(3867 Right eyes, 3819 Left eyes)
